# Supplementary material for: Forward polarization enhanced all-polymer based sustainable triboelectric nanogenerator from oriented electrospinning PVDF/cellulose nanofibers for energy harvesting
Source: Royal Society of Chemistry journal article supplement (doi:10.1039/d2se00321j), 2022-01-01
Supplement: d2se00321j1.pdf [file d2se00321j1.pdf]

## Supplementary Material

### **Forward polarization enhanced all-polymer based sustainable triboelectric nanogenerator from oriented electrospinning PVDF/cellulose nanofibers for energy harvesting**

*Yiheng Song,<sup>a</sup> Jiangkai Bao,<sup>a</sup> Yang Hu,<sup>a</sup> Haopeng Cai,<sup>a</sup> Chuanxi Xiong,<sup>a</sup> Quanling Yang,<sup>\*a</sup> Huafeng Tian,<sup>\*b</sup> and Zhuqun Shi<sup>\*c</sup>*

a. School of Materials Science and Engineering, Wuhan University of Technology, Luoshi Road 122, Wuhan 430070, China. E-mail addresses: yangql@whut.edu.cn (Q. Yang).

b. Key Laboratory of Processing and Quality Evaluation Technology of Green Plastics of China National Light Industry Council, Beijing Technology and Business University, Beijing 100048, China. E-mail addresses: tianhuafeng@th.btbu.edu.cn (H. Tian)

c. School of Chemistry, Chemical Engineering and Life Sciences, Wuhan University of Technology, Luoshi Road 122, Wuhan 430070, China. E-mail addresses: zqshi2016@whut.edu.cn (Z. Shi).

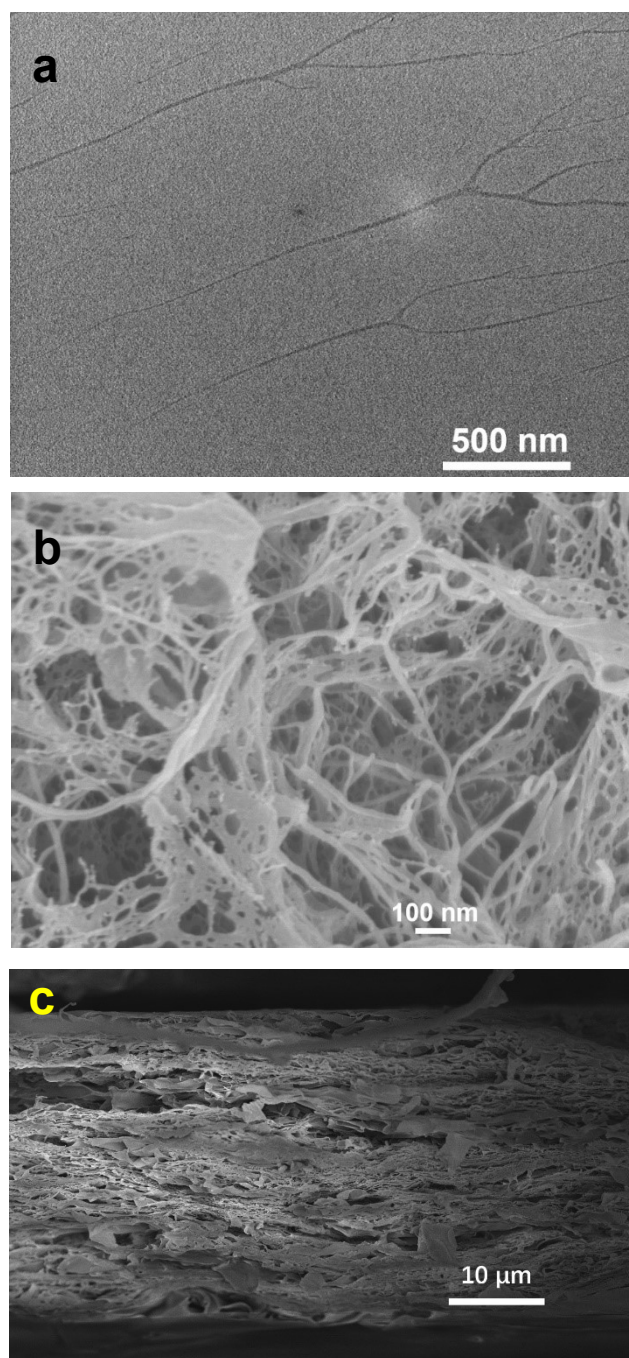

**Figure S1** The TEM image of TOCN dispersion (a), the SEM image of TOCN aerogel (b) and the cross-section SEM morphology (c) of TOCN aerogel film after compression.

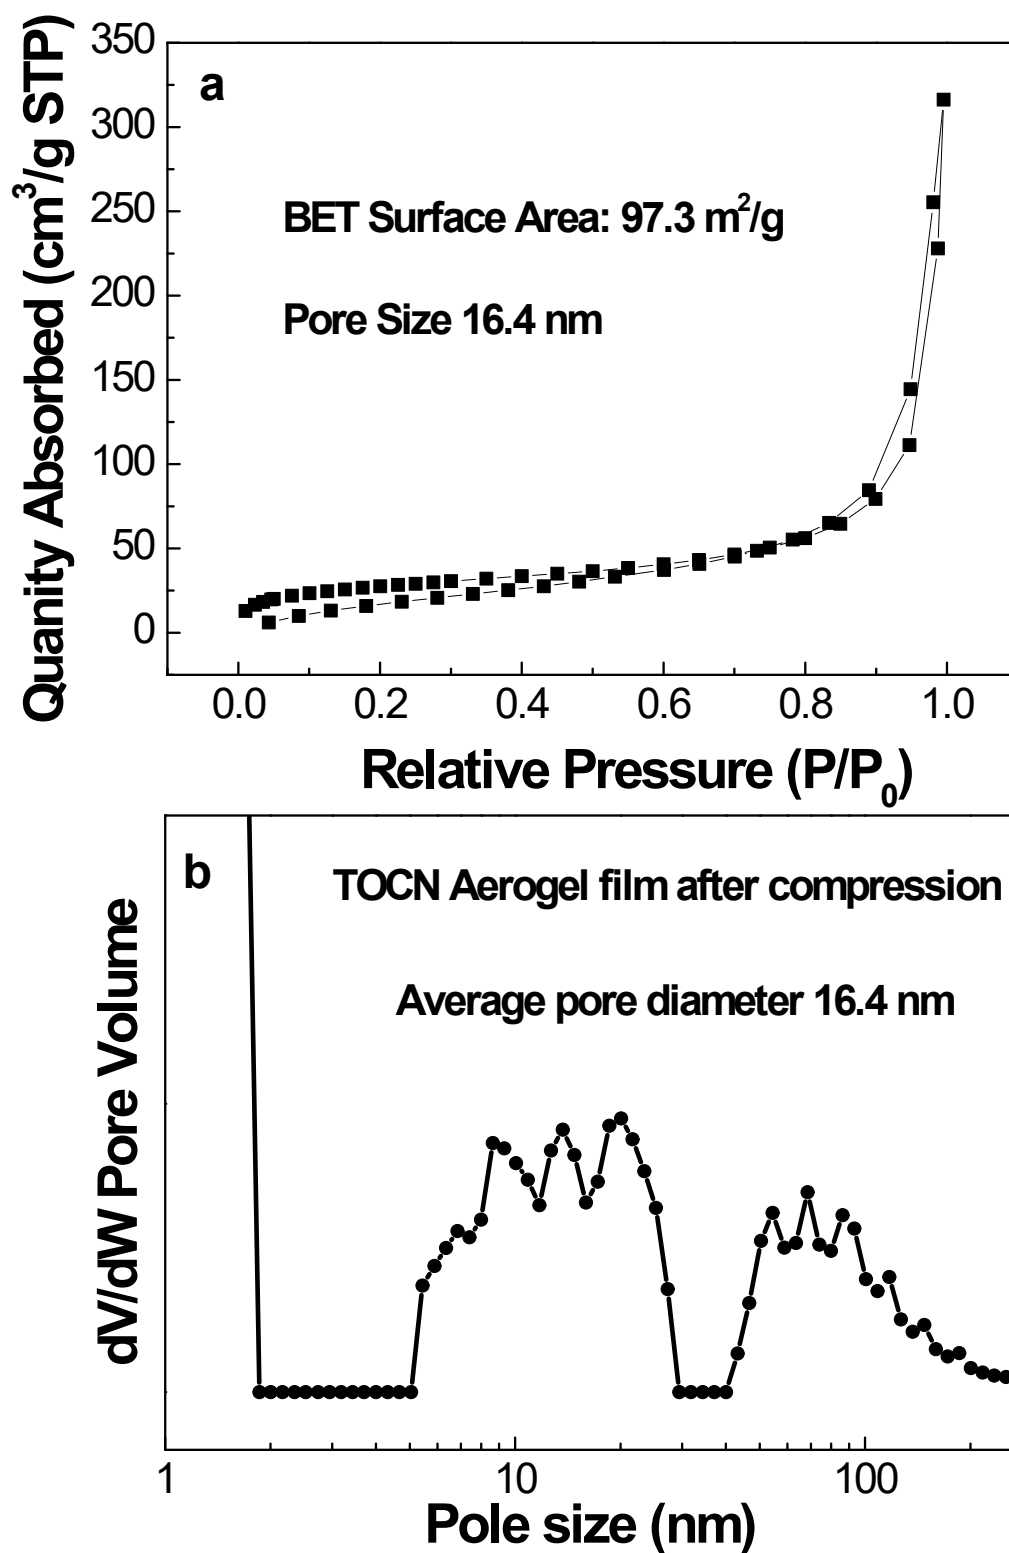

**Figure S2**  $\text{N}_2$  adsorption/desorption isotherms (a) and pore size distributions (b) of the TOCN aerogel film.

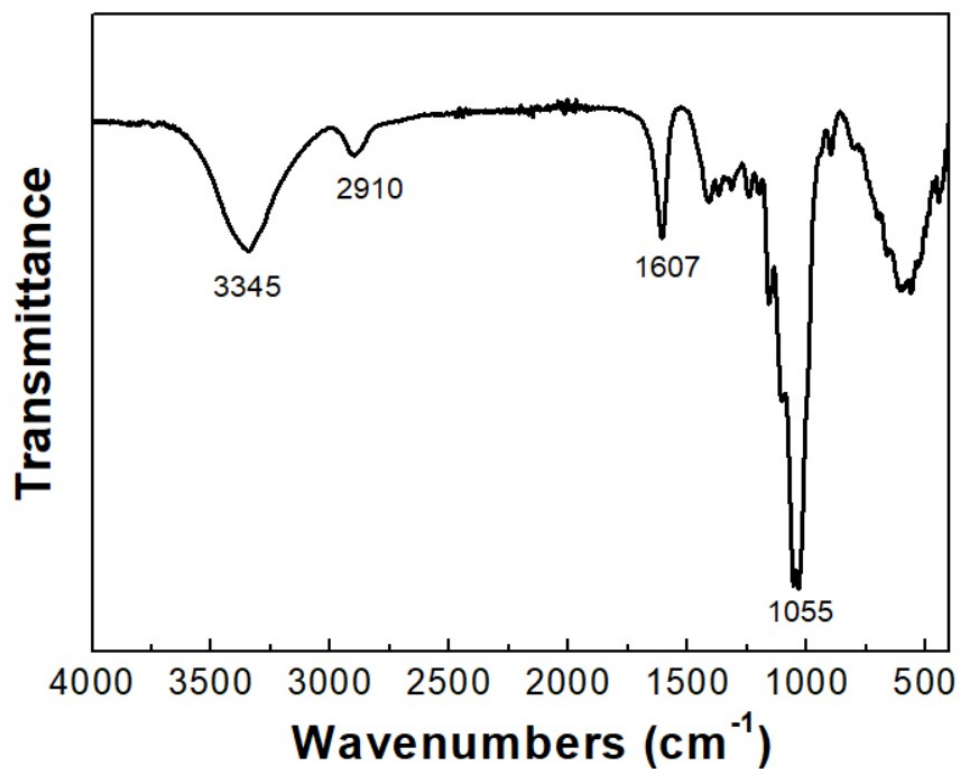

Figure S3 FTIR spectra of TOCN aerogel film

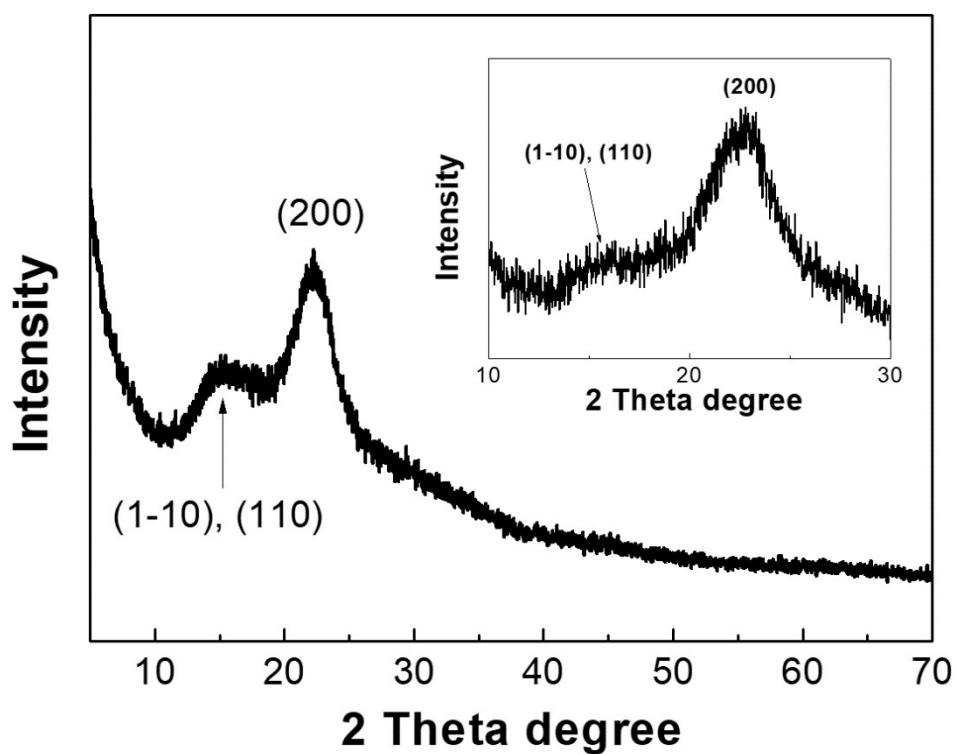

**Figure S4** X-ray diffraction patterns of TOCN aerogel film

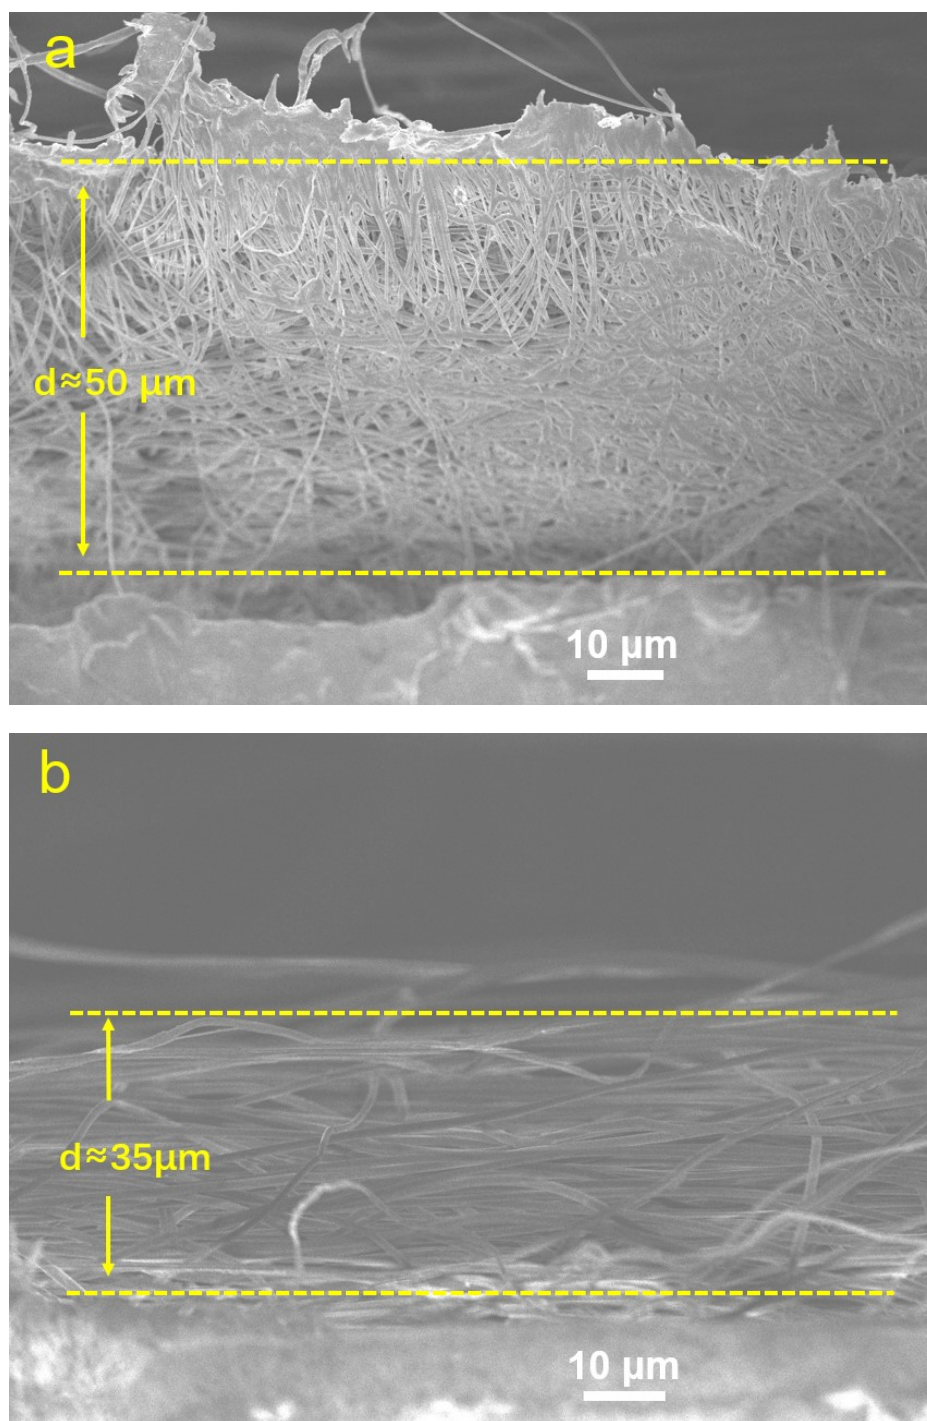

**Figure S5** Cross-sectional SEM images of the RE PVDF (a) and OE PVDF film (b).

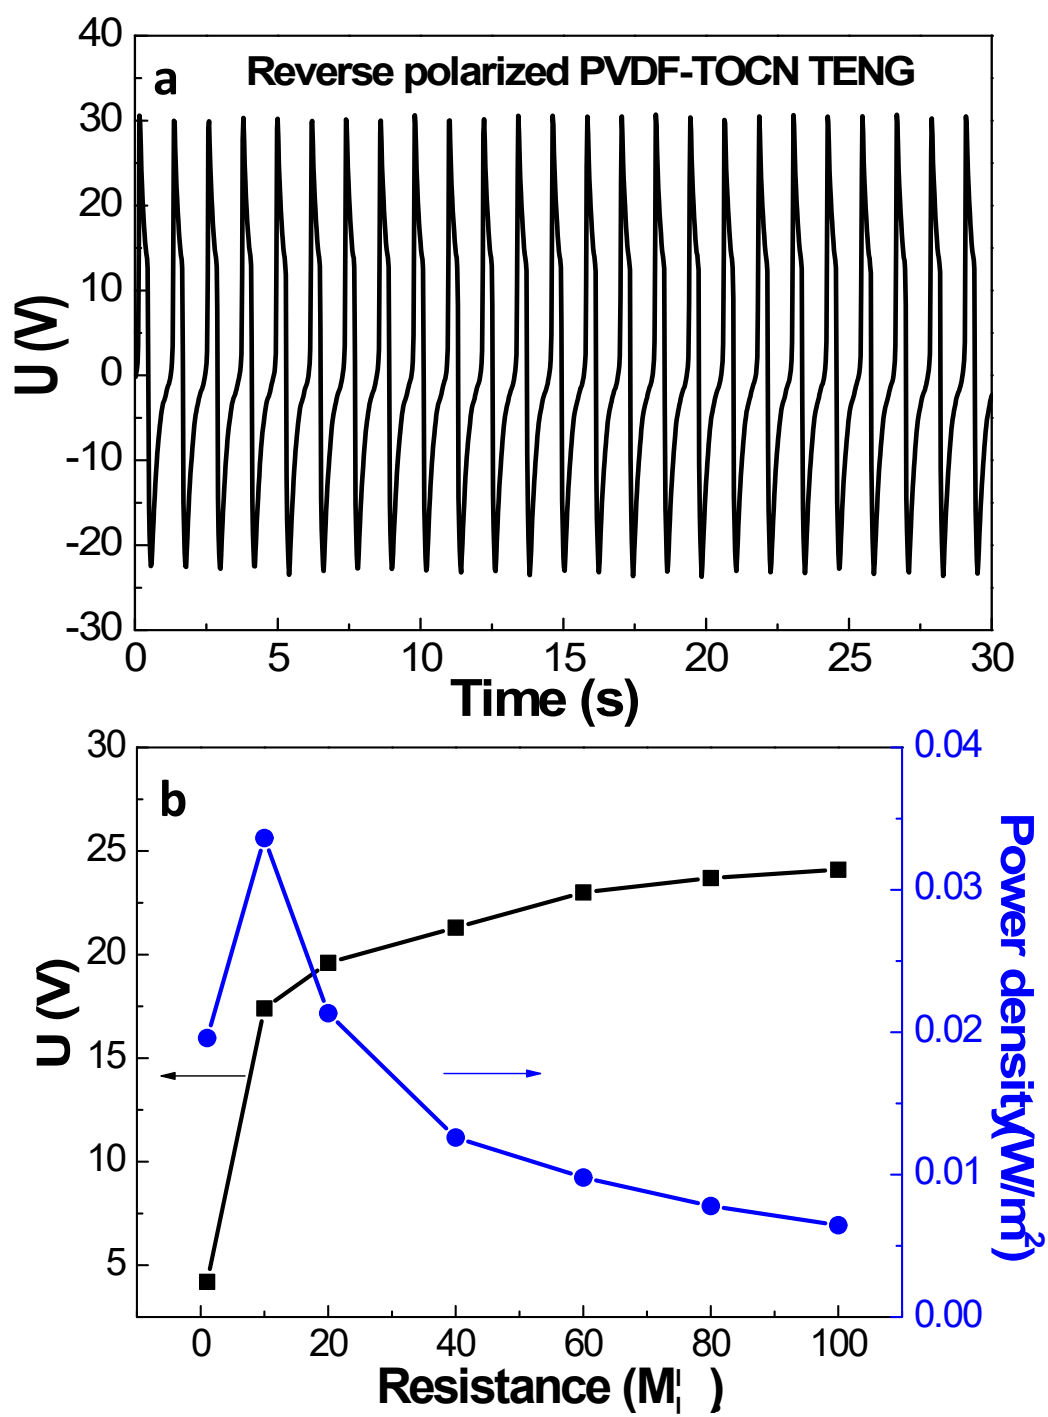

**Figure S6** The outputted  $U_{oc}$  (a) and the power density (b) of reverse polarized PVDF-TOCN TENG with an area of 9 cm<sup>2</sup>, the external force condition is 10 N at 1 Hz.

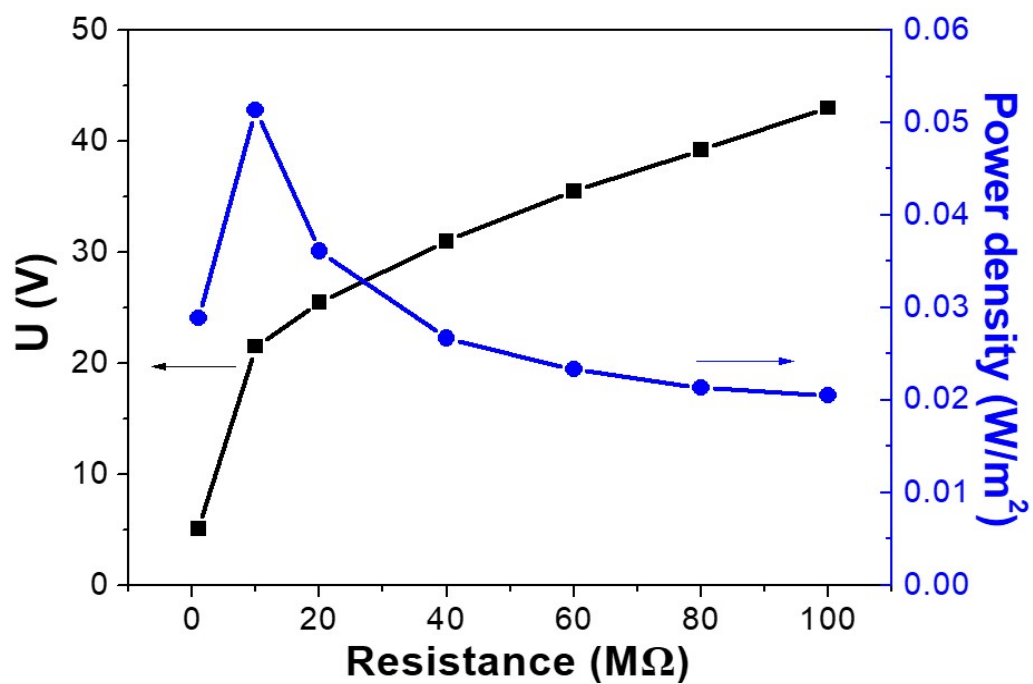

**Figure S7** Open circuit voltage and power density of the RE PVDF-TOCN TENG varies with external resistances range from 1  $M\Omega$  to 100  $M\Omega$ .



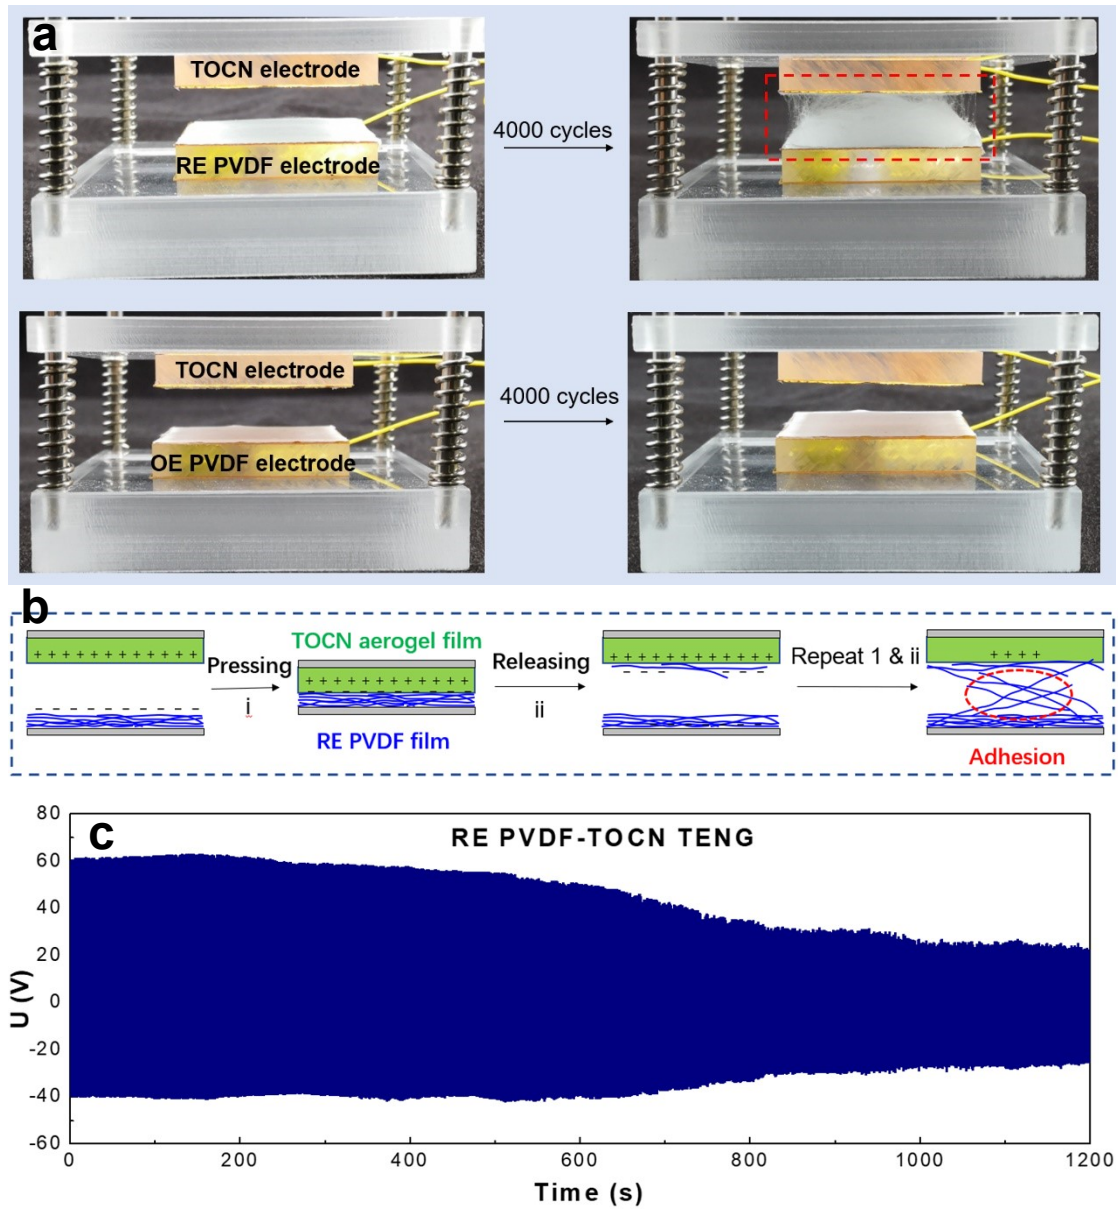

**Figure S8** Photograph of the OE/RE PVDF-TOCN TENG devices before and after 4000 cycles (a); Schematic diagram of the formation of fibrous adhesion of the RE PVDF-TOCN TENG under longtime operation (b); Output voltage of the RE PVDF-TOCN TENG during 4000 cycles at a frequency of 3 Hz (c).
